# Supplementary material for: Construction of hybrid multi-shell hollow structured CeO2–MnOx materials for selective catalytic reduction of NO with NH3
Source: Royal Society of Chemistry journal article supplement (doi:10.1039/c6ra25863h), 2017-01-01
Supplement: c6ra25863h1.pdf [file c6ra25863h1.pdf]

Supporting Information for

Construction of Hybrid Multi-shell Hollow Structured CeO<sub>2</sub>-MnO<sub>x</sub>  
Materials for Selective Catalytic Reduction of NO with NH<sub>3</sub>

*Kaili Ma<sup>a,b</sup>, Weixin Zou<sup>a,b</sup>, Lei Zhang<sup>c</sup>, Lulu Li<sup>a,b</sup>, Shuohan Yu<sup>a,b</sup>, Changjin Tang<sup>a,b\*</sup>, Fei Gao<sup>b</sup>, Lin*

*Dong<sup>a,b\*</sup>*

<sup>a</sup> Key Laboratory of Mesoscopic Chemistry of MOE, School of Chemistry and Chemical Engineering, Nanjing University, Nanjing 210093, P.R. China. \* Email: [tangcj@nju.edu.cn](mailto:tangcj@nju.edu.cn)

<sup>b</sup> Jiangsu Key Laboratory of Vehicle Emissions Control, Center of Modern Analysis, Nanjing University, Nanjing 210093, P.R. China. \* Email: [donglin@nju.edu.cn](mailto:donglin@nju.edu.cn).

<sup>c</sup> School of Environmental and Chemical Engineering, Chongqing Three Gorges University, Wanzhou 404000, P.R. China

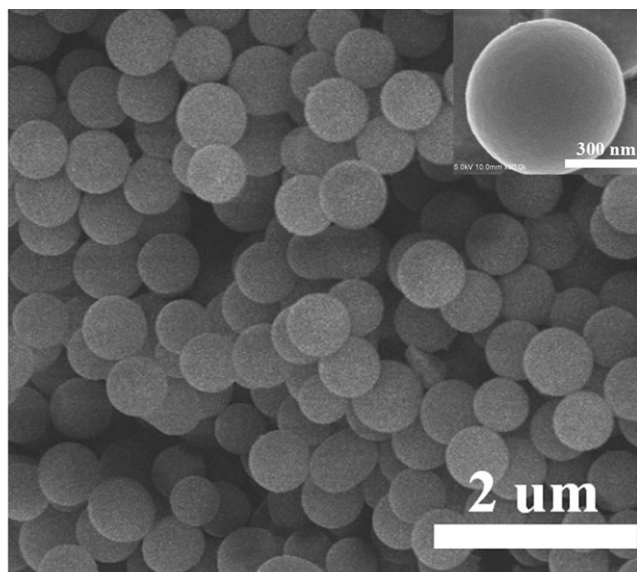

**Figure S1** SEM image of carbon spheres. (Inset shows individual carbon sphere)

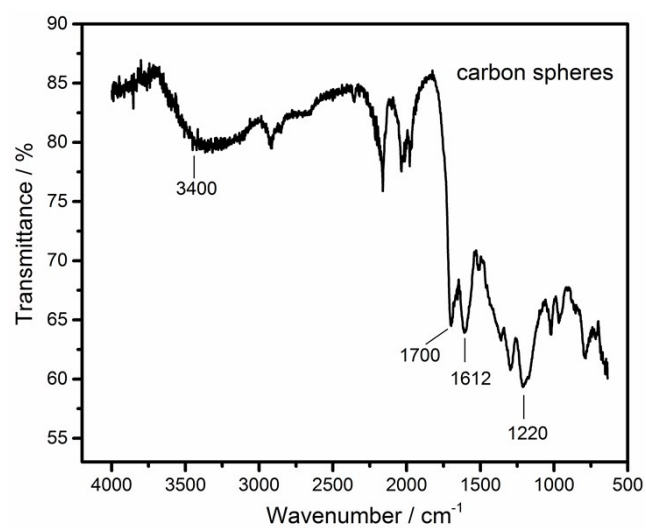

**Figure S2** FT-IR spectrum of obtained carbon spheres.

The absorption peaks at  $3400\text{ cm}^{-1}$  and  $1612\text{ cm}^{-1}$  were attributed to the stretching and bending vibration of -OH, respectively. While the weak absorption peaks at  $1700\text{ cm}^{-1}$  and  $1220\text{ cm}^{-1}$  exhibited stretching vibration of C=O and C-O, respectively. The result indicated the

existence of abundant superficial active functional groups on the surface of obtained carbon spheres, including -COOH, -OH, C=O, etc.

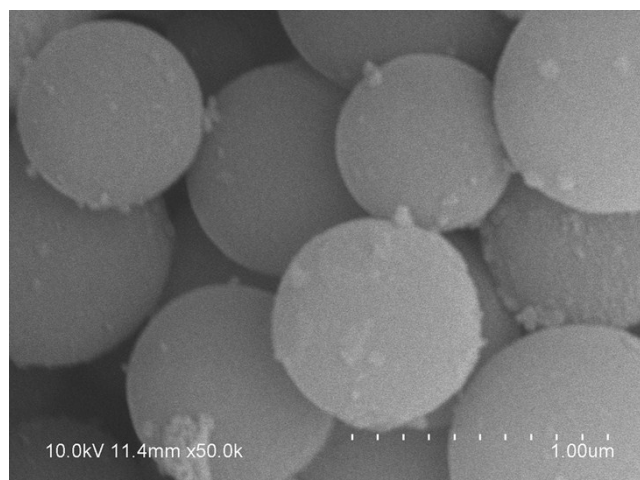

**Figure S3** SEM image of CSs@CeO<sub>2</sub>-MnO<sub>x</sub> precursor.

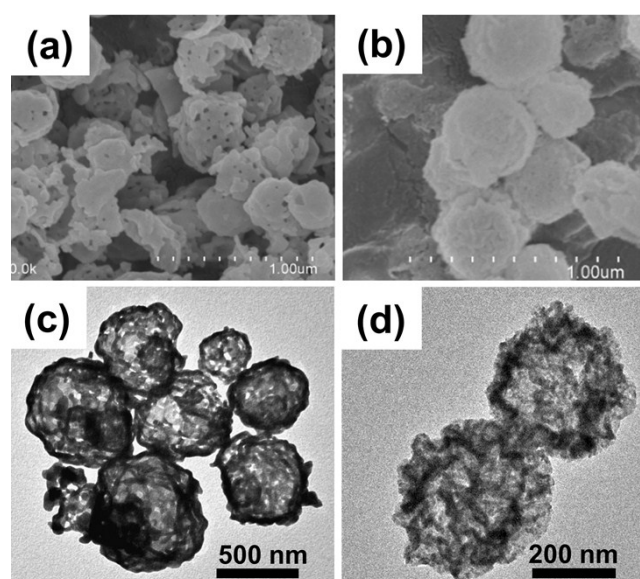

**Figure S4** SEM and TEM images of (a, c) Mn<sub>2</sub>O<sub>3</sub> and (b, d) CeO<sub>2</sub> hollow spheres at heat ramp rate of 5 °C min<sup>-1</sup>.

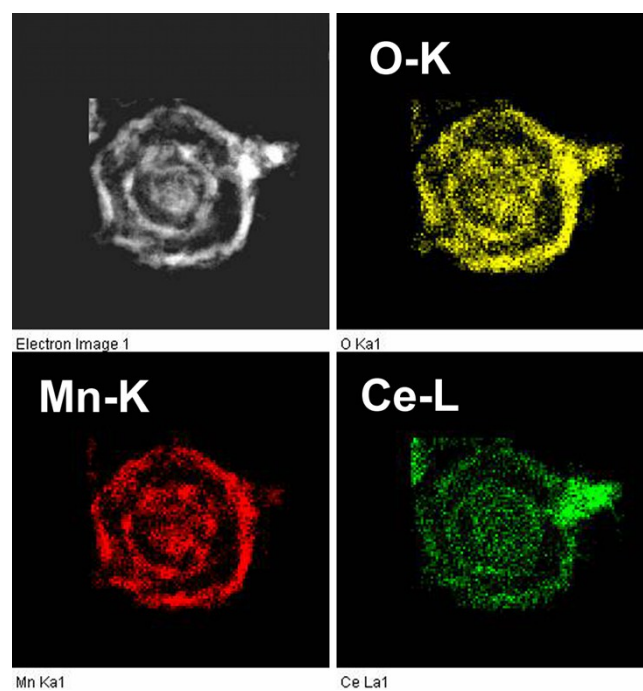

**Figure S5** HAADF-STEM mapping images of one occasional triple-shell hollow sphere with non-dispersed particles.
